# Supplementary material for: No evidence for negative impacts of acute sulfoxaflor exposure on bee olfactory conditioning or working memory
Source: PeerJ. 2019 Aug 12;7:e7208. doi: 10.7717/peerj.7208 (PMC6694785; doi:10.7717/peerj.7208)
Supplement: Supplemental Information 2 [file peerj-07-7208-s004.xlsx]

## Sheet: RAM_data
Subject	Colony	Treatment	Bee size	correct_in_first_8	total_revisits	correct_before_first_revisit	event: 1 = first revisit
3	3	Control	6.36	6	4	6	1
4	3	Control	5.7	1	3	5	1
5	3	Control	5.94	6	10	2	1
8	4	Control	6.39	7	1	7	1
15	4	Control	6.24	4	5	4	1
16	4	Control	6.26	4	4	4	1
17	4	Control	6.11	7	2	7	1
22	5	Control	6.12	5	1	7	1
26	5	Control	5.84	6	0	8	0
40	7	Control	5.99	6	2	5	1
48	7	Control	6.63	6	2	7	1
49	7	Control	5.98	6	7	6	1
56	7	Control	5.64	6	0	8	0
58	7	Control	6.32	2	1	5	1
2	3	5ppb	5	5	17	3	1
11	4	5ppb	5.7	3	11	3	1
12	4	5ppb	6.26	5	5	5	1
20	5	5ppb	5.85	5	2	6	1
21	5	5ppb	5.72	5	3	6	1
24	5	5ppb	5.82	5	3	5	1
27	5	5ppb	6.02	6	6	2	1
32	5	5ppb	5.21	6	1	6	1
34	6	5ppb	5.86	5	11	2	1
38	7	5ppb	6.68	5	1	6	1
44	7	5ppb	5.8	4	7	3	1
46	7	5ppb	6.09	2	0	2	1
47	7	5ppb	5.87	5	17	4	1
51	7	5ppb	6.04	7	1	7	1
53	7	5ppb	6.1	5	14	4	1
6	3	10ppb	6.27	0	2	3	1
7	4	10ppb	6.04	5	0	8	0
9	4	10ppb	5.83	4	2	5	1
13	4	10ppb	5.28	4	2	3	1
14	4	10ppb	5.23	5	1	6	1
25	5	10ppb	5.56	4	1	4	1
28	5	10ppb	5.24	7	10	7	1
30	5	10ppb	5.39	4	3	6	1
33	5	10ppb	5.61	2	2	7	1
36	7	10ppb	6.33	6	4	5	1
37	7	10ppb	6.16	6	3	7	1
41	7	10ppb	6.3	5	2	4	1
43	7	10ppb	5.86	5	16	4	1
52	7	10ppb	5.98	4	14	3	1
54	7	10ppb	5.83	6	15	3	1
1	3	250ppb	5.63	7	5	7	1
10	4	250ppb	5.92	5	6	3	1
18	4	250ppb	5.53	2	0	4	1
19	5	250ppb	5.94	5	13	5	1
23	5	250ppb	6.24	4	7	7	1
29	5	250ppb	6.3	5	5	3	1
31	5	250ppb	5.19	5	3	3	1
35	6	250ppb	5.87	4	3	5	1
39	7	250ppb	6.21	4	13	5	1
42	7	250ppb	6.03	5	17	5	1
45	7	250ppb	5.99	5	3	6	1
50	7	250ppb	6.01	4	3	3	1
55	7	250ppb	6.43	5	3	3	1
57	7	250ppb	6.06	4	7	4	1
