# Supplementary material for: No evidence for negative impacts of acute sulfoxaflor exposure on bee olfactory conditioning or working memory
Source: PeerJ. 2019 Aug 12;7:e7208. doi: 10.7717/peerj.7208 (PMC6694785; doi:10.7717/peerj.7208)
Supplement: Supplemental Information 3 [file peerj-07-7208-s005.xlsx]

## Sheet: honey_bee_learning
subject	treatment	colony	trial number	bee had first positive response	learnt yes/no	learning_level (number of positive responses)	bee_size
2	10ppb	6	10	1	1	1	3.90667
3	2.4ppb	6	15	0	0	0	4.03667
4	Control	6	15	0	0	0	3.78
6	10ppb	6	15	0	0	0	3.80333
7	2.4ppb	6	15	0	0	0	4.03667
10	10ppb	6	15	0	0	0	3.97
91	Control	6	2	1	1	13	3.86333
92	250ppb	6	6	1	1	2	3.9
94	Control	6	15	0	0	0	4.12333
97	2.4ppb	6	12	1	1	1	4.07333
98	Control	6	15	0	0	0	3.98667
99	10ppb	6	4	1	1	3	4.06667
116	2.4ppb	6	15	0	0	0	4.07
118	250ppb	6	15	0	0	0	3.85
119	Control	6	3	1	1	6	3.89667
120	2.4ppb	6	3	1	1	6	3.97667
121	10ppb	6	15	0	0	0	4.01333
122	250ppb	6	15	0	0	0	3.84333
123	Control	6	15	0	0	0	3.82333
125	10ppb	6	4	1	1	2	3.76333
127	Control	6	15	0	0	0	4.01
128	2.4ppb	6	15	0	0	0	3.95
11	2.4ppb	7	15	0	0	0	3.88
13	250ppb	7	11	1	1	1	4.06
19	2.4ppb	7	15	0	0	0	4.03333
20	Control	7	2	1	1	4	3.84333
69	Control	7	8	1	1	1	3.73
70	250ppb	7	9	1	1	1	3.77
73	Control	7	15	0	0	0	3.60333
75	10ppb	7	15	0	0	0	3.84667
76	2.4ppb	7	15	0	0	0	3.90333
101	250ppb	7	4	1	1	6	3.89667
103	Control	7	4	1	1	1	4.01
104	2.4ppb	7	15	0	0	0	3.77333
105	10ppb	7	15	0	0	0	3.72
111	Control	7	15	0	0	0	3.80333
114	250ppb	7	15	0	0	0	3.68333
29	250ppb	8	2	1	1	13	3.90667
31	250ppb	8	15	0	0	0	3.85333
33	250ppb	8	10	1	1	1	4.03
34	250ppb	8	7	1	1	4	3.72667
36	250ppb	8	3	1	1	2	3.91333
37	10ppb	8	2	1	1	11	3.64333
41	10ppb	8	2	1	1	4	3.84667
42	10ppb	8	15	0	0	0	3.68
43	10ppb	8	15	0	0	0	3.97667
46	2.4ppb	8	2	1	1	13	3.78667
47	2.4ppb	8	3	1	1	3	3.86
48	2.4ppb	8	11	1	1	1	3.83
51	2.4ppb	8	3	1	1	1	3.99667
54	2.4ppb	8	15	0	0	0	3.85333
55	Control	8	2	1	1	14	3.73
56	Control	8	15	0	0	0	3.92
57	Control	8	5	1	1	4	4.00333
58	Control	8	3	1	1	3	3.74333
59	Control	8	15	0	0	0	3.91
61	Control	8	15	0	0	0	3.86
62	Control	8	3	1	1	9	3.73
63	Control	8	15	0	0	0	3.92
22	10ppb	9	3	1	1	5	4.04333
24	Control	9	15	0	0	0	3.95667
26	10ppb	9	10	1	1	1	3.90333
79	Control	9	2	1	1	3	3.77333
80	250ppb	9	15	0	0	0	3.68333
81	10ppb	9	14	1	1	2	3.78667
82	10ppb	9	2	1	1	13	3.68
84	Control	9	15	1	1	1	3.95333
85	250ppb	9	15	0	0	0	3.63
87	2.4ppb	9	15	0	0	0	3.68667
88	Control	9	4	1	1	1	3.72667
89	250ppb	9	4	1	1	6	3.99
129	250ppb	9	15	0	0	0	3.86333
133	10ppb	9	3	1	1	3	3.96
134	250ppb	9	3	1	1	7	3.89333
135	Control	9	3	1	1	12	4.11
136	2.4ppb	9	15	0	0	0	3.92667
138	250ppb	9	15	0	0	0	3.88333
140	10ppb	9	15	1	1	1	3.7
141	2.4ppb	9	15	0	0	0	3.94
145	Control	10	10	1	1	1	3.70333
146	250ppb	10	15	0	0	0	3.75
149	Control	10	15	0	0	0	3.93667
152	2.4ppb	10	9	1	1	2	3.69
154	250ppb	10	4	1	1	3	3.89333
160	2.4ppb	10	15	0	0	0	4.10667
163	10ppb	10	15	0	0	0	3.75667
164	2.4ppb	10	15	0	0	0	3.73333
166	250ppb	10	6	1	1	6	3.91333
174	10ppb	10	15	0	0	0	3.79333
167	10ppb	10	15	0	0	0	3.85333
168	Control	10	11	1	1	2	4
170	10ppb	10	15	0	0	0	3.91667
171	2.4ppb	10	15	0	0	0	3.54667
172	Control	10	3	1	1	5	3.69

## Sheet: honey_bee_3H
subject	treatment	colony	Bee responded positively 3H	Bee size
2	10ppb	6	0	3.90667
4	Control	6	0	3.78
6	10ppb	6	1	3.80333
7	2.4ppb	6	0	4.03667
10	10ppb	6	0	3.97
91	Control	6	1	3.86333
92	250ppb	6	0	3.9
94	Control	6	0	4.12333
97	2.4ppb	6	1	4.07333
98	Control	6	0	3.98667
99	10ppb	6	1	4.06667
116	2.4ppb	6	0	4.07
118	250ppb	6	0	3.85
119	Control	6	0	3.89667
120	2.4ppb	6	1	3.97667
121	10ppb	6	0	4.01333
122	250ppb	6	0	3.84333
123	Control	6	0	3.82333
125	10ppb	6	0	3.76333
127	Control	6	0	4.01
128	2.4ppb	6	0	3.95
11	2.4ppb	7	0	3.88
13	250ppb	7	0	4.06
19	2.4ppb	7	0	4.03333
20	Control	7	0	3.84333
69	Control	7	0	3.73
70	250ppb	7	0	3.77
73	Control	7	0	3.60333
75	10ppb	7	0	3.84667
76	2.4ppb	7	0	3.90333
101	250ppb	7	1	3.89667
103	Control	7	0	4.01
104	2.4ppb	7	0	3.77333
105	10ppb	7	0	3.72
111	Control	7	0	3.80333
114	250ppb	7	0	3.68333
29	250ppb	8	1	3.90667
33	250ppb	8	0	4.03
34	250ppb	8	1	3.72667
36	250ppb	8	0	3.91333
37	10ppb	8	0	3.64333
41	10ppb	8	1	3.84667
42	10ppb	8	0	3.68
43	10ppb	8	0	3.97667
46	2.4ppb	8	1	3.78667
47	2.4ppb	8	0	3.86
48	2.4ppb	8	1	3.83
51	2.4ppb	8	1	3.99667
54	2.4ppb	8	0	3.85333
55	Control	8	1	3.73
56	Control	8	0	3.92
58	Control	8	1	3.74333
59	Control	8	0	3.91
61	Control	8	0	3.86
62	Control	8	1	3.73
63	Control	8	0	3.92
22	10ppb	9	0	4.04333
24	Control	9	0	3.95667
26	10ppb	9	0	3.90333
79	Control	9	0	3.77333
80	250ppb	9	0	3.68333
81	10ppb	9	0	3.78667
82	10ppb	9	0	3.68
84	Control	9	1	3.95333
85	250ppb	9	0	3.63
87	2.4ppb	9	0	3.68667
88	Control	9	0	3.72667
89	250ppb	9	1	3.99
129	250ppb	9	0	3.86333
133	10ppb	9	0	3.96
134	250ppb	9	1	3.89333
135	Control	9	1	4.11
136	2.4ppb	9	0	3.92667
138	250ppb	9	0	3.88333
140	10ppb	9	0	3.7
141	2.4ppb	9	0	3.94
145	Control	10	0	3.70333
146	250ppb	10	0	3.75
149	Control	10	0	3.93667
152	2.4ppb	10	0	3.69
154	250ppb	10	0	3.89333
160	2.4ppb	10	0	4.10667
163	10ppb	10	0	3.75667
164	2.4ppb	10	0	3.73333
166	250ppb	10	1	3.91333
174	10ppb	10	0	3.79333
167	10ppb	10	0	3.85333
168	Control	10	0	4
170	10ppb	10	1	3.91667
171	2.4ppb	10	0	3.54667
172	Control	10	0	3.69

## Sheet: honey_bee_24H
subject	treatment	colony	Bee responded positively 24H	Bee size
2	10ppb	6	1	3.90667
4	Control	6	0	3.78
7	2.4ppb	6	0	4.03667
10	10ppb	6	0	3.97
92	250ppb	6	0	3.9
94	Control	6	0	4.12333
98	Control	6	1	3.98667
99	10ppb	6	0	4.06667
116	2.4ppb	6	0	4.07
118	250ppb	6	0	3.85
119	Control	6	1	3.89667
121	10ppb	6	0	4.01333
122	250ppb	6	1	3.84333
123	Control	6	1	3.82333
125	10ppb	6	0	3.76333
127	Control	6	0	4.01
128	2.4ppb	6	0	3.95
13	250ppb	7	0	4.06
19	2.4ppb	7	0	4.03333
20	Control	7	0	3.84333
69	Control	7	1	3.73
70	250ppb	7	1	3.77
73	Control	7	0	3.60333
75	10ppb	7	0	3.84667
103	Control	7	1	4.01
104	2.4ppb	7	0	3.77333
105	10ppb	7	1	3.72
114	250ppb	7	1	3.68333
33	250ppb	8	1	4.03
34	250ppb	8	1	3.72667
36	250ppb	8	1	3.91333
37	10ppb	8	0	3.64333
41	10ppb	8	0	3.84667
42	10ppb	8	0	3.68
43	10ppb	8	1	3.97667
46	2.4ppb	8	1	3.78667
47	2.4ppb	8	1	3.86
54	2.4ppb	8	1	3.85333
55	Control	8	1	3.73
56	Control	8	1	3.92
58	Control	8	1	3.74333
59	Control	8	1	3.91
61	Control	8	1	3.86
62	Control	8	1	3.73
63	Control	8	0	3.92
22	10ppb	9	0	4.04333
24	Control	9	0	3.95667
26	10ppb	9	1	3.90333
79	Control	9	1	3.77333
80	250ppb	9	0	3.68333
81	10ppb	9	1	3.78667
85	250ppb	9	1	3.63
87	2.4ppb	9	1	3.68667
88	Control	9	1	3.72667
134	250ppb	9	1	3.89333
138	250ppb	9	1	3.88333
140	10ppb	9	1	3.7
141	2.4ppb	9	1	3.94
145	Control	10	1	3.70333
146	250ppb	10	0	3.75
149	Control	10	0	3.93667
152	2.4ppb	10	0	3.69
154	250ppb	10	1	3.89333
163	10ppb	10	0	3.75667
164	2.4ppb	10	0	3.73333
166	250ppb	10	1	3.91333
167	10ppb	10	1	3.85333
171	2.4ppb	10	0	3.54667
172	Control	10	1	3.69
